# Supplementary material for: Assessing the living and dead proportions of cold-water coral colonies: implications for deep-water Marine Protected Area monitoring in a changing ocean
Source: PubMed Central journal article supplement (PMC5632539; doi:10.7717/peerj.3705), 2017-10-05
Supplement: peerj-05-3705-s001.pdf [file peerj-05-3705-s001.pdf]

| Site     | Dive | Coral  | layer thickness | Mean | SD  | Living layer thickness | Mean | SD      | Whole colony size | Mean   | SD  |
|----------|------|--------|-----------------|------|-----|------------------------|------|---------|-------------------|--------|-----|
| Mingulay | 1    | c1     | 675             | 747  | 66  | 92                     | 126  | 30      | 767.00            | 873    | 90  |
|          |      |        | 807             |      |     | 125                    |      |         | 932.00            |        |     |
|          |      |        | 823             |      |     | 171                    |      |         | 994.00            |        |     |
|          |      |        | 731             |      |     | 106                    |      |         | 837.00            |        |     |
|          |      |        | 697             |      |     | 137                    |      |         | 834.00            |        |     |
|          | 3    | c1     | 250             | 276  | 32  | 42                     | 48   | 13      | 292.00            | 324    | 43  |
|          |      |        | 250             |      |     | 41                     |      |         | 291.00            |        |     |
|          |      |        | 319             |      |     | 53                     |      |         | 372.00            |        |     |
|          |      |        | 301             |      |     | 68                     |      |         | 369.00            |        |     |
|          |      |        | 259             |      |     | 35                     |      |         | 294.00            |        |     |
|          | 3    | c2     | 425             | 498  | 57  | 128                    | 136  | 7       | 553.00            | 634    | 64  |
|          |      |        | 526             |      |     | 138                    |      |         | 664.00            |        |     |
|          |      |        | 544             |      |     | 144                    |      |         | 688.00            |        |     |
|          |      |        | 545             |      |     | 141                    |      |         | 686.00            |        |     |
|          |      |        | 448             |      |     | 129                    |      |         | 577.00            |        |     |
|          | 5    | c1     | 725             | 692  | 25  | 184                    | 176  | 16      | 909.00            | 868    | 32  |
|          |      |        | 687             |      |     | 158                    |      |         | 845.00            |        |     |
|          |      |        | 655             |      |     | 183                    |      |         | 838.00            |        |     |
|          |      |        | 701             |      |     | 195                    |      |         | 896.00            |        |     |
|          |      |        | 693             |      |     | 161                    |      |         | 854.00            |        |     |
| Banana   | 7    | c1     | 605             | 719  | 75  | 261                    | 260  | 10      | 866.00            | 979    | 75  |
|          |      |        | 716             |      |     | 246                    |      |         | 962.00            |        |     |
|          |      |        | 731             |      |     | 273                    |      |         | 1004.00           |        |     |
|          |      |        | 814             |      |     | 257                    |      |         | 1071.00           |        |     |
|          |      |        | 728             |      |     | 262                    |      |         | 990.00            |        |     |
|          |      |        | 611             |      |     | 584                    |      |         | 21                |        |     |
| 583      | 71   | 654.00 |                 |      |     |                        |      |         |                   |        |     |
| 567      | 92   | 659.00 |                 |      |     |                        |      |         |                   |        |     |
| 561      | 66   | 627.00 |                 |      |     |                        |      |         |                   |        |     |
| 599      | 88   | 687.00 |                 |      |     |                        |      |         |                   |        |     |
| 8        | c2   | 372    | 463             | 52   | 156 |                        | 129  | 19      |                   | 528.00 | 592 |
|          |      | 472    |                 |      | 130 | 602.00                 |      |         |                   |        |     |
|          |      | 492    |                 |      | 108 | 600.00                 |      |         |                   |        |     |
|          |      | 499    |                 |      | 114 | 613.00                 |      |         |                   |        |     |
|          |      | 482    |                 |      | 136 | 618.00                 |      |         |                   |        |     |
| 8        | c3   | 912    | 997             | 73   | 195 | 207                    | 26   | 1107.00 | 1204              | 87     |     |
|          |      | 1030   |                 |      | 171 |                        |      | 1201.00 |                   |        |     |
|          |      | 1051   |                 |      | 227 |                        |      | 1278.00 |                   |        |     |
|          |      | 1067   |                 |      | 237 |                        |      | 1304.00 |                   |        |     |
|          |      | 924    |                 |      | 207 |                        |      | 1131.00 |                   |        |     |
|          |      | 857    |                 |      | 103 |                        |      | 960.00  |                   |        |     |

|          |    |     |      |      |     |         |     |        |         |      |     |
|----------|----|-----|------|------|-----|---------|-----|--------|---------|------|-----|
| Mingulay | 8  | c4  | 1046 | 940  | 78  | 109     | 110 | 7      | 1155.00 | 1051 | 79  |
|          |    |     | 871  |      |     | 113     |     |        | 984.00  |      |     |
|          |    |     | 965  |      |     | 105     |     |        | 1070.00 |      |     |
|          |    |     | 963  |      |     | 121     |     |        | 1084.00 |      |     |
|          | 8  | c5  | 1061 | 1045 | 58  | 223     | 204 | 17     | 1284.00 | 1249 | 66  |
|          |    |     | 966  |      |     | 186     |     |        | 1152.00 |      |     |
|          |    |     | 1081 |      |     | 220     |     |        | 1301.00 |      |     |
|          |    |     | 1110 |      |     | 190     |     |        | 1300.00 |      |     |
|          |    |     | 1008 |      |     | 201     |     |        | 1209.00 |      |     |
|          | 8  | c6  | 616  | 675  | 89  | 137     | 160 | 28     | 753.00  | 835  | 104 |
|          |    |     | 677  |      |     | 136     |     |        | 813.00  |      |     |
|          |    |     | 560  |      |     | 171     |     |        | 731.00  |      |     |
|          |    |     | 744  |      |     | 154     |     |        | 898.00  |      |     |
|          |    |     | 777  |      |     | 203     |     |        | 980.00  |      |     |
|          | 10 | c1  | 1186 | 1070 | 92  | 194     | 196 | 20     | 1380.00 | 1265 | 95  |
|          |    |     | 934  |      |     | 192     |     |        | 1126.00 |      |     |
|          |    |     | 1065 |      |     | 168     |     |        | 1233.00 |      |     |
|          |    |     | 1110 |      |     | 200     |     |        | 1310.00 |      |     |
|          |    |     | 1053 |      |     | 224     |     |        | 1277.00 |      |     |
|          | 10 | c2  | 1303 | 1208 | 124 | 134     | 136 | 18     | 1437.00 | 1344 | 115 |
|          |    |     | 1117 |      |     | 120     |     |        | 1237.00 |      |     |
| 1035     |    |     | 167  |      |     | 1202.00 |     |        |         |      |     |
| 1284     |    |     | 134  |      |     | 1418.00 |     |        |         |      |     |
| 1300     |    |     | 127  |      |     | 1427.00 |     |        |         |      |     |
| 41       | c1 | 269 | 268  | 9    | 79  | 76      | 10  | 348.00 | 344     | 19   |     |
|          |    | 259 |      |      | 70  |         |     | 329.00 |         |      |     |
|          |    | 282 |      |      | 92  |         |     | 374.00 |         |      |     |
|          |    | 262 |      |      | 65  |         |     | 327.00 |         |      |     |
|          |    | 268 |      |      | 74  |         |     | 342.00 |         |      |     |
| Pisces   | 31 | c1  | 1281 | 964  | 200 | 188     | 148 | 33     | 1469.00 | 1112 | 226 |
|          |    |     | 854  |      |     | 103     |     |        | 957.00  |      |     |
|          |    |     | 798  |      |     | 127     |     |        | 925.00  |      |     |
|          |    |     | 1043 |      |     | 155     |     |        | 1198.00 |      |     |
|          |    |     | 846  |      |     | 166     |     |        | 1012.00 |      |     |
|          | 31 | c2  | 750  | 780  | 82  | 180     | 165 | 19     | 930.00  | 945  | 70  |
|          |    |     | 767  |      |     | 154     |     |        | 921.00  |      |     |
|          |    |     | 778  |      |     | 147     |     |        | 925.00  |      |     |
|          |    |     | 913  |      |     | 152     |     |        | 1065.00 |      |     |
|          |    |     | 691  |      |     | 191     |     |        | 882.00  |      |     |
|          | 32 | c1  | 1120 | 946  | 116 | 231     | 181 | 38     | 1351.00 | 1127 | 152 |
|          |    |     | 892  |      |     | 158     |     |        | 1050.00 |      |     |
|          |    |     | 877  |      |     | 145     |     |        | 1022.00 |      |     |
|          |    |     | 894  |      |     | 191     |     |        | 1085.00 |      |     |

|  |    |    |     |     |    |     |     |    |         |      |    |
|--|----|----|-----|-----|----|-----|-----|----|---------|------|----|
|  |    |    | 817 |     |    | 183 |     |    | 1000.00 |      |    |
|  |    |    | 906 |     |    | 217 |     |    | 1123.00 |      |    |
|  |    |    | 847 |     |    | 171 |     |    | 1018.00 |      |    |
|  |    |    | 764 |     |    | 199 |     |    | 963.00  |      |    |
|  | 32 | c2 | 806 | 828 | 53 | 132 | 180 | 32 | 938.00  | 1008 | 71 |
